# Supplementary material for: Gas chromatography-mass spectrometric identification of cyanide using a nucleophilic substitution based derivatization with S-phenyl benzenethiosulfonate
Source: Royal Society of Chemistry journal article supplement (doi:10.1039/d0ay01643h), 2020-01-01
Supplement: d0ay01643h1.pdf [file d0ay01643h1.pdf]

## Supplementary Information

### **Gas Chromatography-Mass Spectrometric Identification of Cyanide Using a Nucleophilic Substitution Based Derivatization with *s*-Phenyl benzenethiosulfonate**

D. Raghavender Goud, Kanchan Sinha Roy, Deepak Pardasani, Ajay Kumar Purohit, Vijay Kumar Tak, Devendra Kumar Dubey\*

VERTOX Laboratory, Defence R&D Establishment, Gwalior, India

#### **Supplementary Information:**

##### **Contents:**

|                                                                                              |                   |
|----------------------------------------------------------------------------------------------|-------------------|
| <b>1. General details</b>                                                                    | <b>S-2</b>        |
| <b>2. Figures</b>                                                                            | <b>S-2 to S-5</b> |
| <b>3. Procedures</b>                                                                         | <b>S-6</b>        |
| <b>4. Selected copies of <math>^1\text{H}</math>, <math>^{13}\text{C}</math> NMR spectra</b> | <b>S-6 to S7</b>  |
| <b>5. Tables</b>                                                                             | <b>S-7</b>        |

## 1. General details

Reagents were obtained from commercial supplier, and used without further purification. Solvents used were purified by standard methods prior to use. The GC-MS analyses were performed on Agilent 6890 GC, with model 5973 mass selective detector. NMR spectra were recorded on a Bruker AVANCE II 400 MHz. TLC analysis was performed on silica gel 60 F<sub>254</sub> plates and column chromatography was conducted over silica gel (mesh 100-200).

## 2. Figures

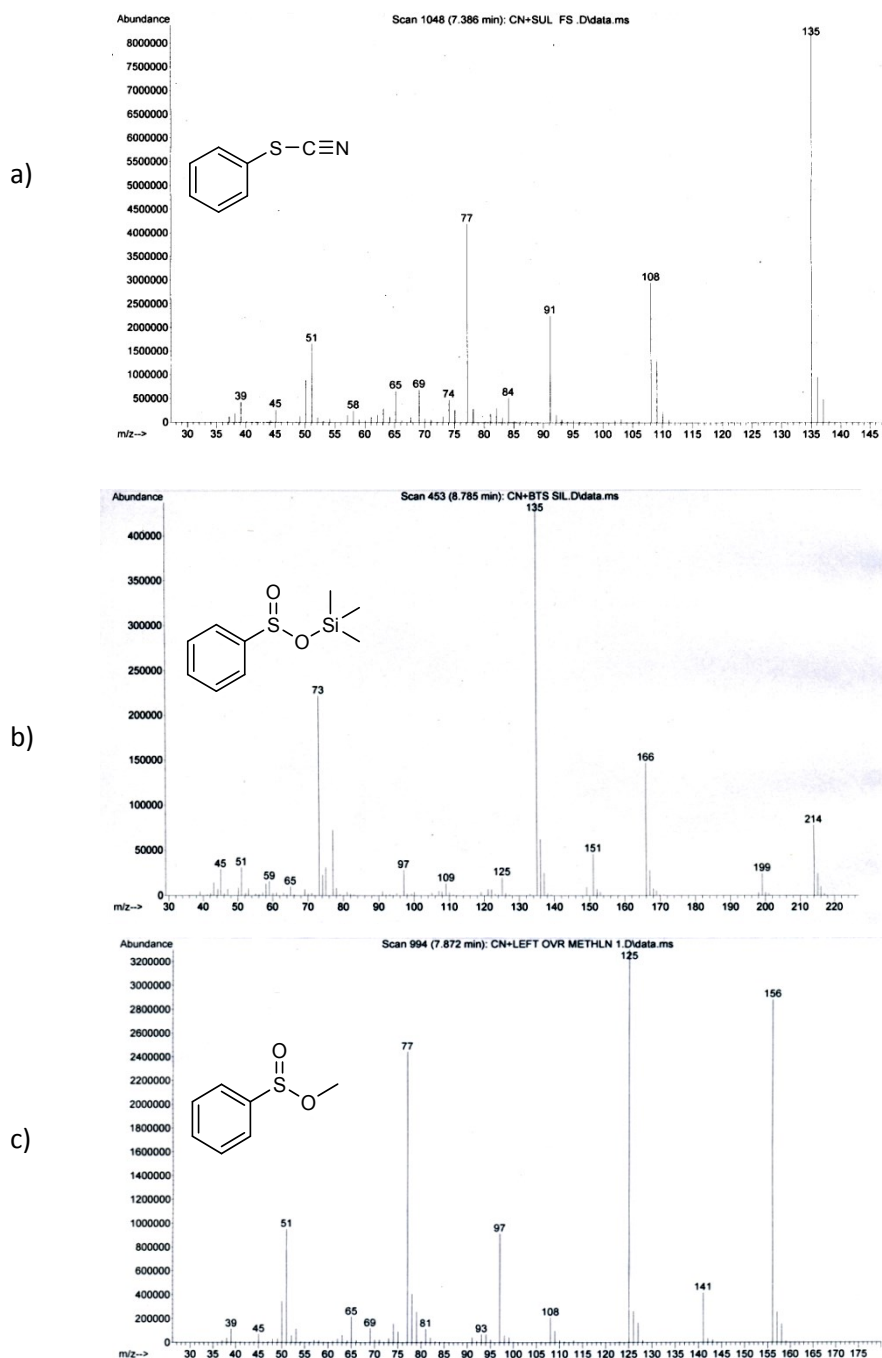

**Figure-S1:** a) Derivatized product phenyl thiocyanate in organic extraction b) Trimethyl silyl and c) methyl derivatives of reaction product Phenyl sulfinic acid in aqueous layer

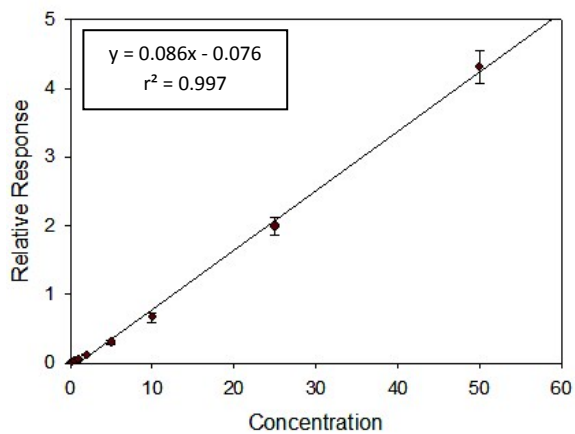

**Figure-S2:** Concentration Vs Relative response of derivatized product

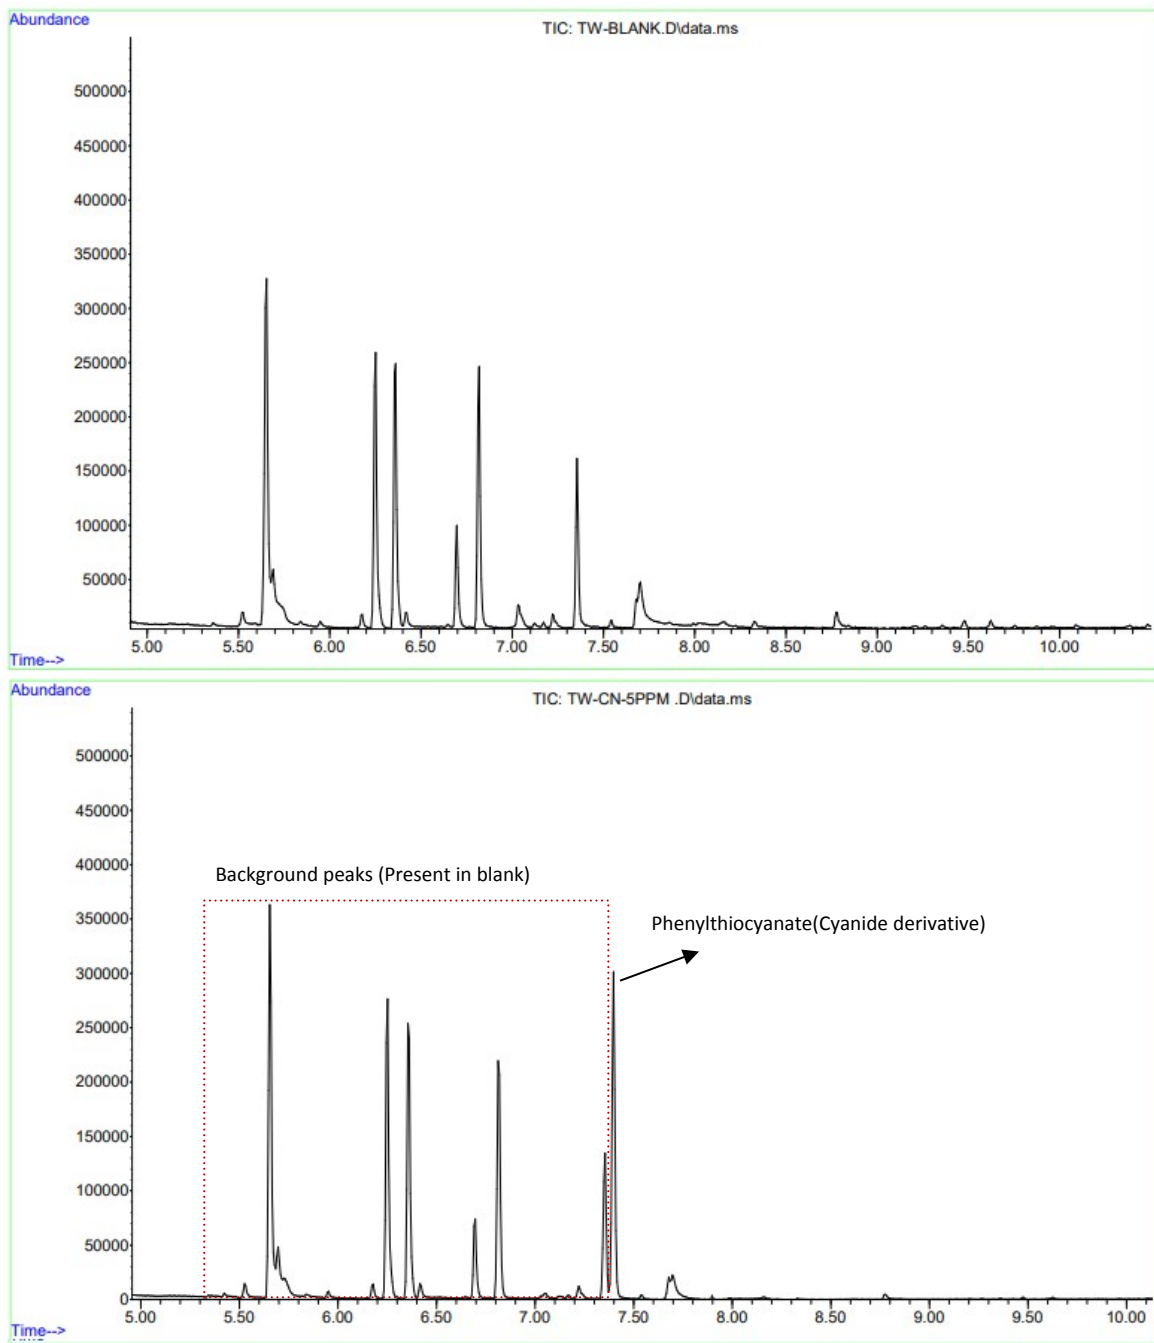

**Figure-S3:** Top: Total ion chromatogram of ethyl acetate extraction of blank sample of tap water after treating with derivatization reagent.

Bottom: Total ion chromatogram of ethyl acetate extraction of 5 ppm cyanide sample of tap water after treating with derivatization reagent. (derivatized product phenyl thiocyanate at 7.39 min)

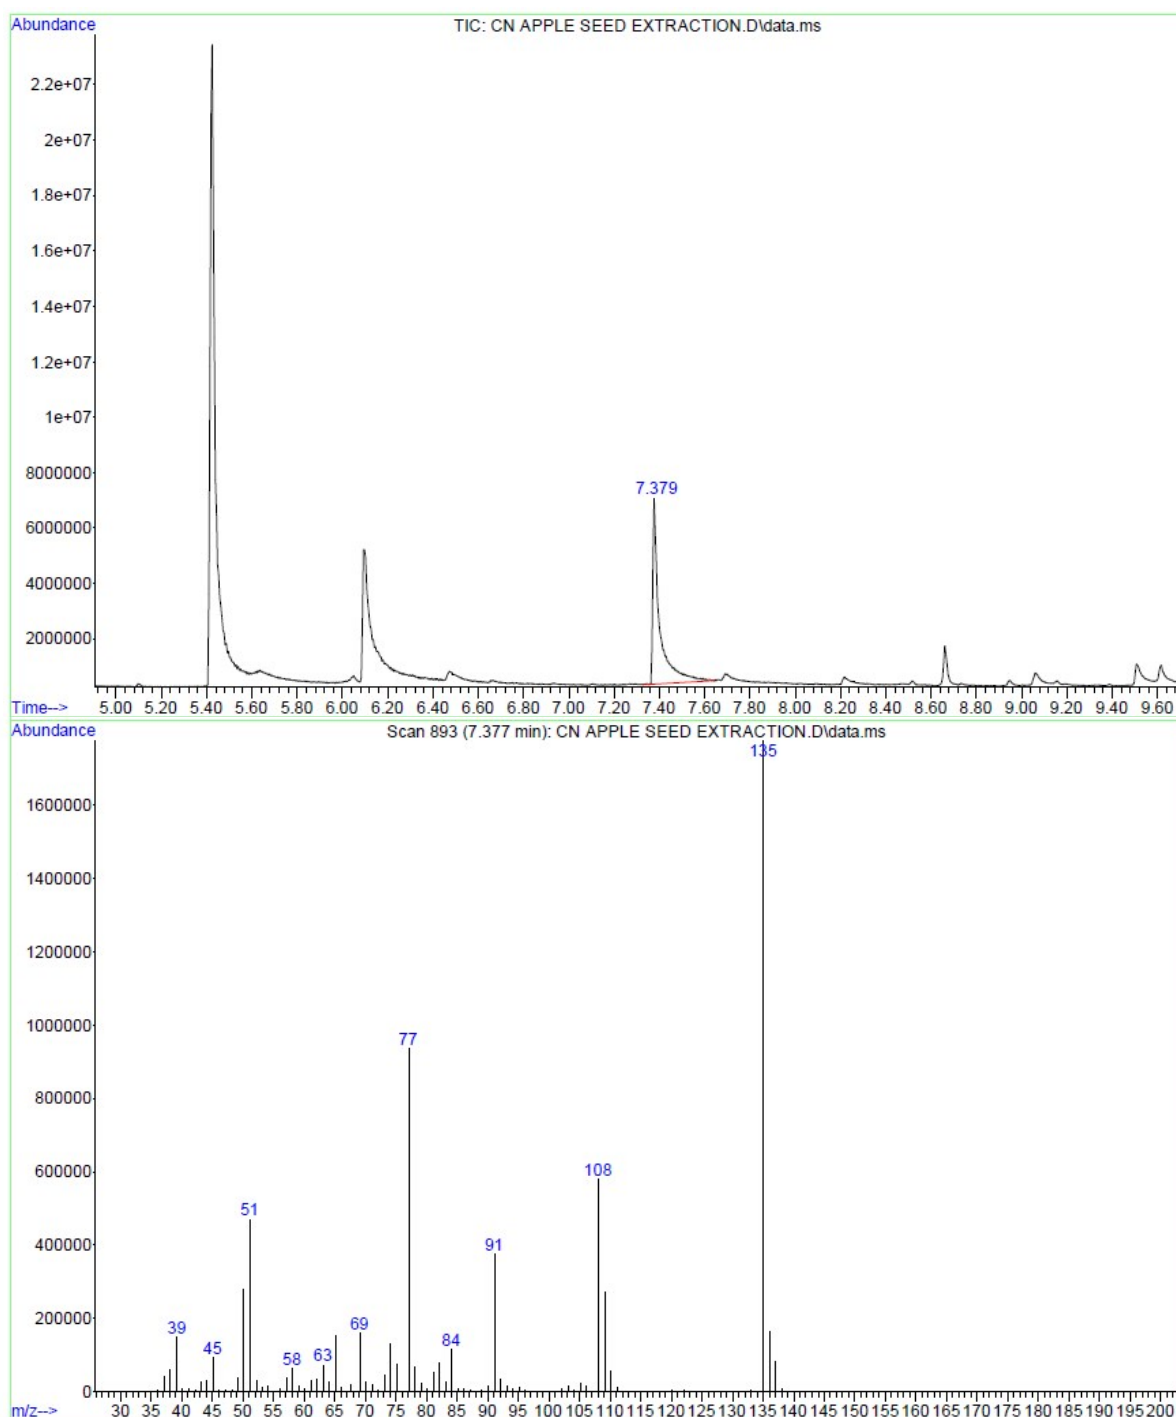

**Figure-S4:** Top: Total ion chromatogram of ethyl acetate extraction of sample of apple seed extraction after treating with derivatization reagent.

Bottom: Mass spectrum of cyanide derivatized product phenyl thiocyanate at 7.379 min)



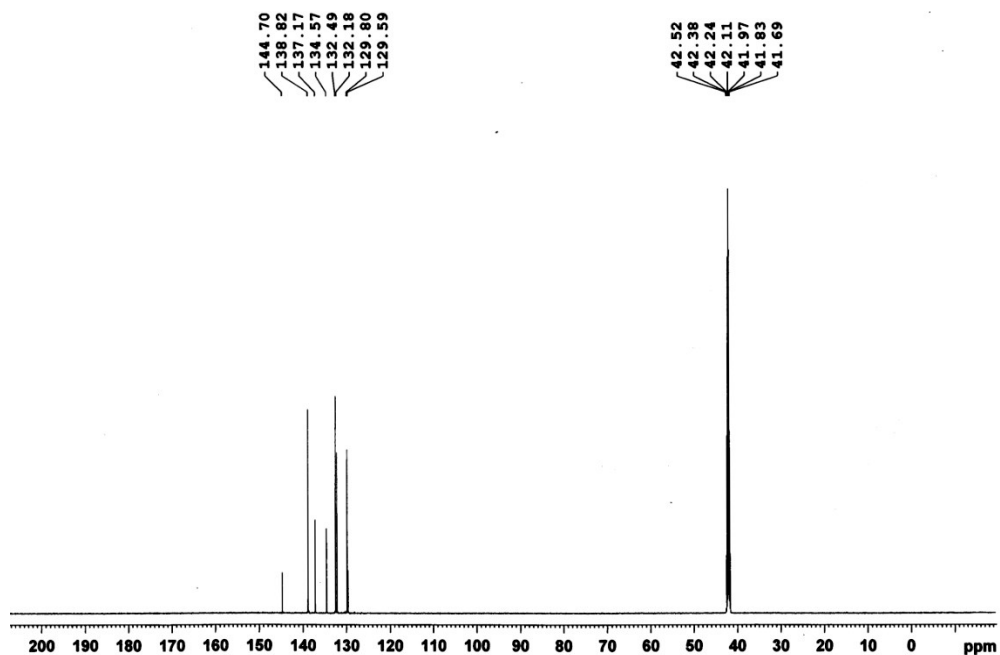

**Figure-S6:**  $^{13}\text{C}$  NMR spectra of derivatization reagent *s*-phenyl benzenethiosulfonate

| S.No. | Derivatization reagent                                                                | Analytical Technique | Limit of Detection (LOD)                | Limit of Quantitation (LOQ)        | Derivatization reaction conditions | Pre-concentration                   |
|-------|---------------------------------------------------------------------------------------|----------------------|-----------------------------------------|------------------------------------|------------------------------------|-------------------------------------|
| 1.    | Pentafluoro benzylbromide (polymer bound phosphonium salt as catalyst) (Ref-24)       | GC-MS                | 0.5 $\mu\text{g}/\text{mL}$ (Full Scan) | 0.2 $\mu\text{g}/\text{mL}$ (SIM)  | 38/30min                           | ---                                 |
| 2.    | Two step derivatization<br>1. Benzaldehyde<br>2. heptafluorobutryl chloride<br>Ref-26 | GC-MS                | 0.01 $\mu\text{g}/\text{mL}$ (SIM)      | 0.02 $\mu\text{g}/\text{mL}$ (SIM) | Rt/20min                           | Evaporated to nearly drying         |
| 3.    | 1. cysteine, 2. Hypochloric acid (Ref-27)                                             | LC-MS                | 0.07 $\mu\text{g}/\text{L}$             | 0.2 $\mu\text{g}/\text{L}$         | Rt/ 10 min                         | ---                                 |
| 4.    | 2-(dimethylamino)ethanethiol (Ref-30)                                                 | GC-MS/MS             | 0.02 $\mu\text{g}/\text{mL}$            | 0.07 $\mu\text{g}/\text{mL}$       | 60/ 20 min                         | 10ml water to 100 EtOAc (100 times) |
| 5.    | <i>s</i> -Phenyl benzenethiosulfonate (present study)                                 | GC-MS                | 0.075 $\mu\text{g}/\text{mL}$ (SIM)     | 0.25 $\mu\text{g}/\text{mL}$ (SIM) | Rt/ 5min                           | No pre-concentration                |

**Table-S1: Comparison of reported methods for detection of cyanide and preset study**
